# Supplementary material
Source: PubMed Central journal article supplement (PMC8054510)
Supplement: 41557_2021_662_MOESM62_ESM.pdf [file 41557_2021_662_MOESM62_ESM.pdf]

## Reporting Summary

Nature Research wishes to improve the reproducibility of the work that we publish. This form provides structure for consistency and transparency in reporting. For further information on Nature Research policies, see our [Editorial Policies](#) and the [Editorial Policy Checklist](#).

### Statistics

For all statistical analyses, confirm that the following items are present in the figure legend, table legend, main text, or Methods section.

- |     |           |
|-----|-----------|
| n/a | Confirmed |
|-----|-----------|
- The exact sample size ( $n$ ) for each experimental group/condition, given as a discrete number and unit of measurement
  - A statement on whether measurements were taken from distinct samples or whether the same sample was measured repeatedly
  - The statistical test(s) used AND whether they are one- or two-sided  
*Only common tests should be described solely by name; describe more complex techniques in the Methods section.*
  - A description of all covariates tested
  - A description of any assumptions or corrections, such as tests of normality and adjustment for multiple comparisons
  - A full description of the statistical parameters including central tendency (e.g. means) or other basic estimates (e.g. regression coefficient) AND variation (e.g. standard deviation) or associated estimates of uncertainty (e.g. confidence intervals)
  - For null hypothesis testing, the test statistic (e.g.  $F$ ,  $t$ ,  $r$ ) with confidence intervals, effect sizes, degrees of freedom and  $P$  value noted  
*Give  $P$  values as exact values whenever suitable.*
  - For Bayesian analysis, information on the choice of priors and Markov chain Monte Carlo settings
  - For hierarchical and complex designs, identification of the appropriate level for tests and full reporting of outcomes
  - Estimates of effect sizes (e.g. Cohen's  $d$ , Pearson's  $r$ ), indicating how they were calculated

*Our web collection on [statistics for biologists](#) contains articles on many of the points above.*

### Software and code

Policy information about [availability of computer code](#)

**Data collection** SPS Flow System Automation code was built utilizing NI LabVIEW 2018 (32-bit). NI LabVIEW Runtime 2018, NI-Serial Runtime 17.5, NI-VISA Runtime 18.0, AsiaPumpInterface.h Version 1.2. The LabVIEW code for operating the SPS-flow automated synthesis in this study is available at <https://github.com/nus-automated-flow-system/auto-SPS-Flow-Supplementary-Software>. Text files were made using Microsoft Excel for Office 365 MSO (16.0.12527.21294) 32-bit

**Data analysis** No software was used.

For manuscripts utilizing custom algorithms or software that are central to the research but not yet described in published literature, software must be made available to editors and reviewers. We strongly encourage code deposition in a community repository (e.g. GitHub). See the Nature Research [guidelines for submitting code & software](#) for further information.

### Data

Policy information about [availability of data](#)

All manuscripts must include a [data availability statement](#). This statement should provide the following information, where applicable:

- Accession codes, unique identifiers, or web links for publicly available datasets
- A list of figures that have associated raw data
- A description of any restrictions on data availability

The authors declare that the data that supporting the findings of this study are available within the paper and its Supplementary Information. A movie of the SPS-flow automated synthesis of prexasertib is recorded in Supplementary Movie.

## Field-specific reporting

Please select the one below that is the best fit for your research. If you are not sure, read the appropriate sections before making your selection.

Life sciences  Behavioural & social sciences  Ecological, evolutionary & environmental sciences

For a reference copy of the document with all sections, see [nature.com/documents/nr-reporting-summary-flat.pdf](https://www.nature.com/documents/nr-reporting-summary-flat.pdf)

## Life sciences study design

All studies must disclose on these points even when the disclosure is negative.

|                 |                                                                                                                                                                                                                                                                                                                                                             |
|-----------------|-------------------------------------------------------------------------------------------------------------------------------------------------------------------------------------------------------------------------------------------------------------------------------------------------------------------------------------------------------------|
| Sample size     | No statistical methods were used to predetermine sample sizes. Sample sizes were chosen in order to be able to perform statistical analyses as is standard in the field. Two cell lines were chosen based on the treatment objective with n=3 biologically independent repeats. Two independent experiment was performed and similar results were obtained. |
| Data exclusions | No data were excluded from the cell viability assays                                                                                                                                                                                                                                                                                                        |
| Replication     | Attempts at data replication were successful. To verify the reproducibility of our findings, experiment were performed using three biological repeats in two independent experimental repeats.                                                                                                                                                              |
| Randomization   | Two cell lines were randomized seeded in 96well plates and treated with the same 24 compounds in triplicates.                                                                                                                                                                                                                                               |
| Blinding        | The cell viability assay was conducted blindly by the researcher without knowing the compound's details and structures.                                                                                                                                                                                                                                     |

## Reporting for specific materials, systems and methods

We require information from authors about some types of materials, experimental systems and methods used in many studies. Here, indicate whether each material, system or method listed is relevant to your study. If you are not sure if a list item applies to your research, read the appropriate section before selecting a response.

### Materials & experimental systems

| n/a                                 | Included in the study                                     |
|-------------------------------------|-----------------------------------------------------------|
| <input checked="" type="checkbox"/> | <input type="checkbox"/> Antibodies                       |
| <input type="checkbox"/>            | <input checked="" type="checkbox"/> Eukaryotic cell lines |
| <input checked="" type="checkbox"/> | <input type="checkbox"/> Palaeontology and archaeology    |
| <input checked="" type="checkbox"/> | <input type="checkbox"/> Animals and other organisms      |
| <input checked="" type="checkbox"/> | <input type="checkbox"/> Human research participants      |
| <input checked="" type="checkbox"/> | <input type="checkbox"/> Clinical data                    |
| <input checked="" type="checkbox"/> | <input type="checkbox"/> Dual use research of concern     |

### Methods

| n/a                                 | Included in the study                           |
|-------------------------------------|-------------------------------------------------|
| <input checked="" type="checkbox"/> | <input type="checkbox"/> ChIP-seq               |
| <input checked="" type="checkbox"/> | <input type="checkbox"/> Flow cytometry         |
| <input checked="" type="checkbox"/> | <input type="checkbox"/> MRI-based neuroimaging |

## Eukaryotic cell lines

Policy information about [cell lines](#)

|                                                                   |                                                                                                                                                                               |
|-------------------------------------------------------------------|-------------------------------------------------------------------------------------------------------------------------------------------------------------------------------|
| Cell line source(s)                                               | Human acute lymphocytic leukemia (non-T; non-B), REH and human acute T-lymphoblastic leukemia (MOLT4) were obtained from American Type Culture Collection (Manassas, VA,USA). |
| Authentication                                                    | Both cell lines used in the study have been authenticated by short tandem repeat profile.                                                                                     |
| Mycoplasma contamination                                          | Cell lines have been tested in MycoAlert™ Mycoplasma Detection Kit (Lonza) and are mycoplasma negative.                                                                       |
| Commonly misidentified lines (See <a href="#">ICLAC</a> register) | NA                                                                                                                                                                            |
